# Supplementary figures and images for: Sagittaria Sagittaria polysaccharide protects against retinal vascular damage in diabetic mice by suppressing TLR4 signaling pathway and microglial activation
Source: Research Square preprint supplement (doi:10.21203/rs.3.rs-7204796/v1), 2025-08-12

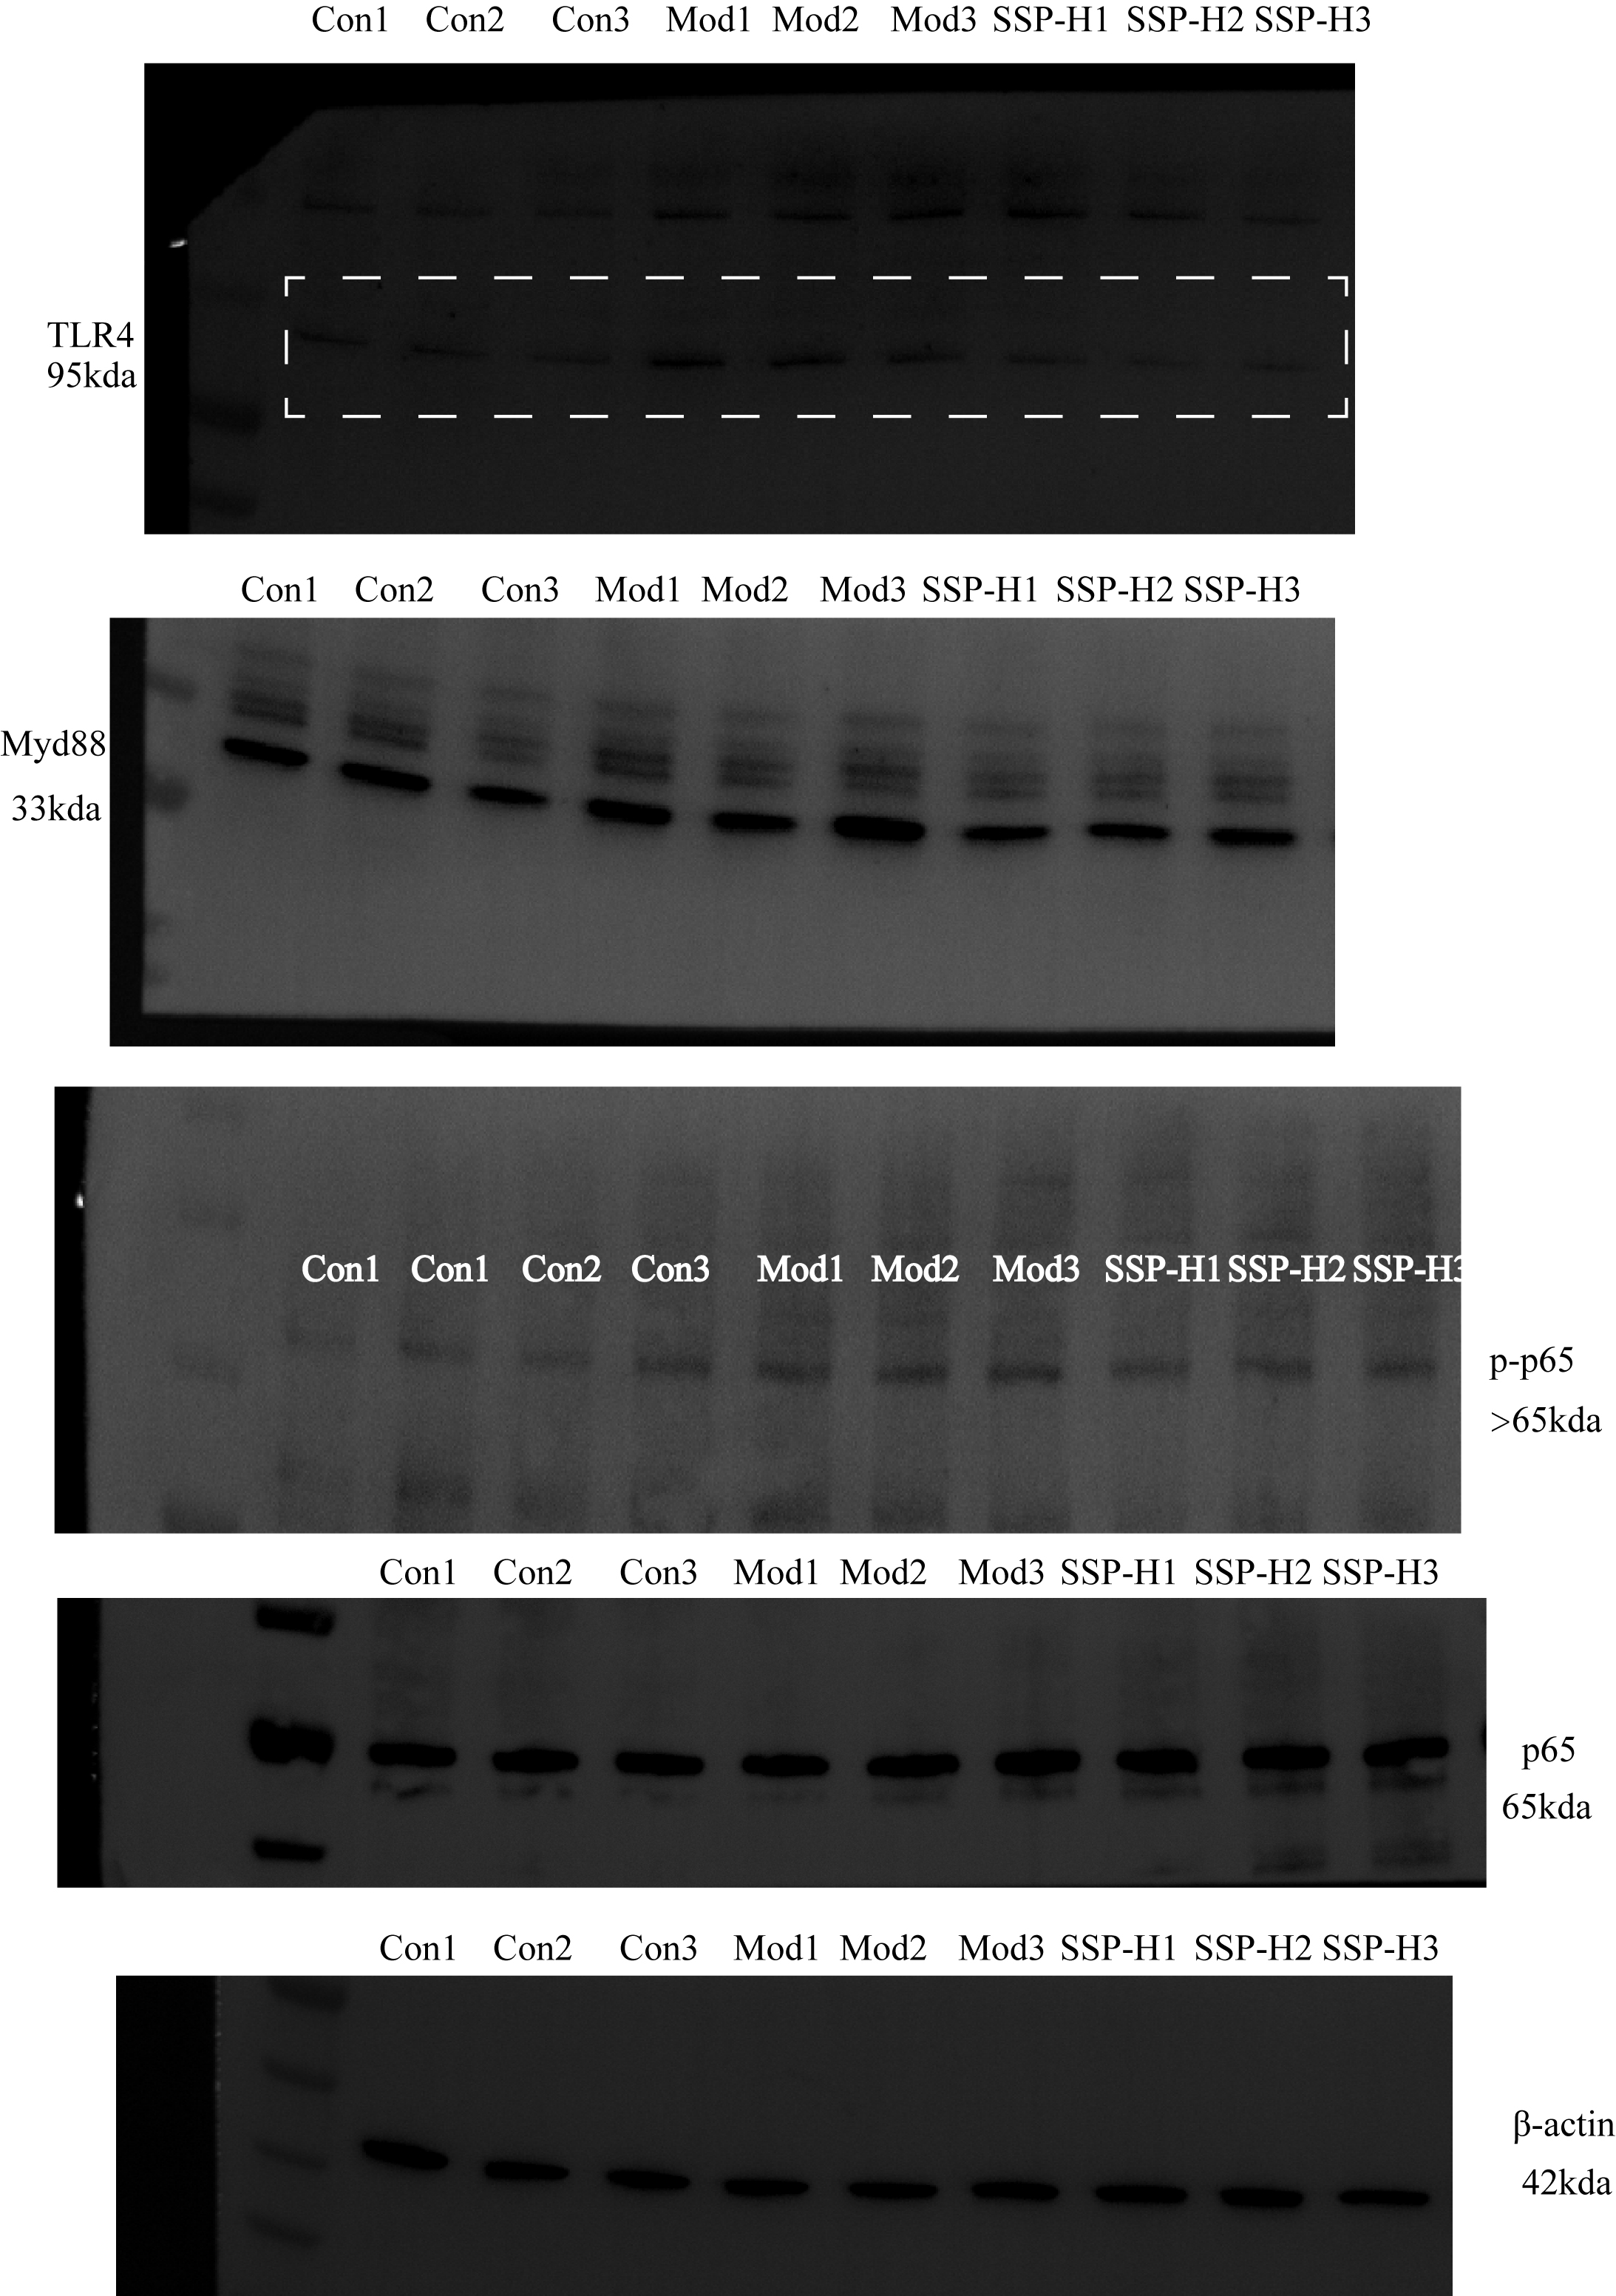

Supplement: Supplementary file 1 [file 8e1616bf68767dbe3d18562e.docx]
